# Supplementary material for: A Review on Ionic Liquids-Based Membranes for Middle and High Temperature Polymer Electrolyte Membrane Fuel Cells (PEM FCs)
Source: MDPI journal article supplement (doi:10.3390/ijms22115430), 2021-05-21
Supplement: s1 [file s1]

**Table S1.** The abbreviation and full chemical name of some common ILs.

| Abbreviation                              | Full chemical name                                                                       |
|-------------------------------------------|------------------------------------------------------------------------------------------|
| [A336][C272]                              | [Trialkylmethylammonium][bis 2,4,4-trimethyl-pentylphosphinate]                          |
| [A336][Cl]; Aliquat 336                   | Tricaprylmethylammonium chloride                                                         |
| [A336][DEHP]                              | Tri-n-octylmethylammonium bis(2-ethylhexyl)phosphate                                     |
| [A336][DGA]                               | Tri-noctylmethylammonium bis(2-ethylhexyl)diglycolamate                                  |
| [A336][MTBA]                              | Tricaprylmethylammonium 2-(methylthio)benzoate                                           |
| [bmim][PF <sub>6</sub> ]                  | 1-butyl-3-methylimidazolium hexafluorophosphate                                          |
| [bmim][BF <sub>4</sub> ]                  | 1-butyl-3-methylimidazolium tetrafluoroborate                                            |
| [bmim][NO <sub>3</sub> ]                  | 1-butyl-3-methylimidazolium nitrate                                                      |
| [bmim][Tf <sub>2</sub> N]                 | 1-butyl-3-methylimidazolium bis(trifluoromethylsulfonyl)imide                            |
| [bmim][TfO]                               | 1-butyl-3-methylimidazolium trifluoromethanesulfonate                                    |
| [bmim][SCN]                               | 1-butyl-3-methylimidazolium thiocyanate                                                  |
| [bmim][DCA]                               | 1-butyl-3-methylimidazolium dicyanamide                                                  |
| [bmim][Ac]                                | 1-butyl-3-methylimidazolium acetate                                                      |
| [bmim][CH <sub>3</sub> SO <sub>3</sub> ]  | 1-Butyl-3-methylimidazolium methanesulfonate                                             |
| [bmim][TFSI]                              | 1-Butyl-3-methylimidazolium bis(trifluoromethanesulfonyl) imide                          |
| [bmim][Br]                                | 1-Butyl-3-methylimidazolium bromide                                                      |
| [bmim][Cl]                                | 1-Butyl-3-methylimidazolium chloride                                                     |
| [bmim][FeCl <sub>4</sub> ]                | 1-Butyl-3-methylimidazolium tetrachloroferrate                                           |
| [bbim][BF <sub>4</sub> ]                  | 1-Benzyl-3-butylimidazolium tetrafluoroborate                                            |
| [BMP][Tf <sub>2</sub> N]                  | 1-butyl-1-methylpyrrolidinium bis(trifluoromethylsulfonyl)imide                          |
| [C <sub>4</sub> mim][Tf <sub>2</sub> N]   | 1-butyl-3-methylimidazolium bis(trifluoromethyl)sulfonylamide                            |
| [C <sub>6</sub> mim][PF <sub>6</sub> ]    | 1-hexyl-3-methylimidazolium hexafluorophosphate                                          |
| [C <sub>8</sub> mim][PF <sub>6</sub> ]    | 1-octyl-3-methylimidazolium hexafluorophosphate                                          |
| [C <sub>9</sub> mim][PF <sub>6</sub> ]    | 1-nonyl-3-methylimidazolium hexafluorophosphate                                          |
| [C <sub>6</sub> mim][BF <sub>4</sub> ]    | 1-hexyl-3-methylimidazolium tetrafluoroborate                                            |
| [C <sub>8</sub> mim][BF <sub>4</sub> ]    | 1-octyl-3-methylimidazolium tetrafluoroborate                                            |
| [C <sub>10</sub> mim][Tf <sub>2</sub> N]  | 1-decyl-3-methylimidazolium bis(trifluoromethyl)sulfonylamide                            |
| Cyanex 272                                | Bis(2,4,4-trimethylpentyl)phosphinic acid                                                |
| Cyanex 302                                | Bis(2,4,4-trimethylpentyl)monothiophosphinic acid                                        |
| [dmim][Tf <sub>2</sub> N]                 | 1,2-dimethylimidazolium bis(trifluoromethylsulfonyl)imide                                |
| [dema][Tf <sub>2</sub> N]                 | Diethylmethylammonium bis(trifluoromethane sulfonyl)amide                                |
| [dema][TfO]                               | Diethylmethylammonium trifluoromethanesulfonate                                          |
| D <sub>2</sub> EHFA                       | Di(2-ethylhexyl)phosphoric acid                                                          |
| [emim][BF <sub>4</sub> ]                  | 1-ethyl-3-methylimidazolium tetrafluoroborate                                            |
| [emim][Tf <sub>2</sub> N]                 | 1-ethyl-3-methylimidazolium bis(trifluoromethylsulfonyl)imide                            |
| [emim][pivalate]                          | 1-ethyl-3-methylimidazolium pivalate                                                     |
| [emim][C <sub>2</sub> N <sub>3</sub> ]    | 1-ethyl-3-methylimidazolium dicyanamide                                                  |
| [emim][Ac]                                | 1-ethyl-3-methylimidazolium acetate                                                      |
| [emim][MDEGSO <sub>4</sub> ]              | 1-ethyl-3-methylimidazolium 2-(2-methoxyethoxy)ethylsulfate                              |
| [emim][lactate]                           | 1-ethyl-3-methylimidazolium lactate                                                      |
| [emim][benzoate]                          | 1-ethyl-3-methylimidazolium benzoate                                                     |
| [HJMT][Cy272]                             | Tertiary alkyl (C6-C12) primary ammonium bis 2,4,4-(trimethylpentyl)phosphinate          |
| HEF                                       | 2-hydroxy ethylammonium formate                                                          |
| HEAF                                      | 2-(2-hydroxy ethoxy)-ammonium formate                                                    |
| HEAA                                      | 2-(2-hydroxy ethoxy)-ammonium acetate                                                    |
| [HOPmim][NO <sub>3</sub> ]                | Hydroxypropylmethylimidazolium nitrate                                                   |
| [MPS <sub>2</sub> PIP][Tf <sub>2</sub> N] | 1-methyl-1-[4,5-bis(methylsulfide)]pentylpiperidin-ium bis(trifluoromethylsulfonyl)imide |
| [MPTPYRRO][Tf <sub>2</sub> N]             | 1-methyl-2-pentenepyrrolidinium bis(trifluoromethylsulfonyl)imide                        |
| [MOPIP][Tf <sub>2</sub> N]                | 1-methyl-1-octylpiperidinium bis(trifluoromethylsulfonyl)imide                           |
| [MTBDH][PhO]                              | 9-methyl-2,3,4,6,7,8-hexahydropyrimido[1,2-a]pyrimidine phenol                           |
| [MTBDH][TFPA]                             | 9-methyl-2,3,4,6,7,8-hexahydropyrimido[1,2-a]pyrimidine imidazole                        |

|                                                       |                                                                                                            |
|-------------------------------------------------------|------------------------------------------------------------------------------------------------------------|
| [MTBDH][Im]                                           | 9-methyl-2,3,4,6,7,8-hexahydropyrimido[1,2-a]pyrimidine trifluoroethanol                                   |
| [MTBDH][TFE]                                          | Methyl trioctyl ammonium chloride                                                                          |
| [MTOA][Cl]                                            | Tetrabutylammonium bis (2-ethylhexyl)phosphate                                                             |
| [N <sub>4444</sub> ][DEHP]                            | N-butylpyridinium tetrafluoroborate                                                                        |
| [N-bupy][BF <sub>4</sub> ]                            | 1-propylamide-3-butyl imidazolium tetrafluoroborate                                                        |
| [NH <sub>2</sub> p-bim][BF <sub>4</sub> ]             | Tetrabutylammonium heptadecafluorooctanesulfonate                                                          |
| [NBu <sub>4</sub> ][(PFOc)SO <sub>3</sub> ]           | Tetramethylammonium glycinate                                                                              |
| [N <sub>1111</sub> ][Gly]                             | 1-octyl-3-methylimidazolium tetrafluoroborate                                                              |
| [OMIM][BF <sub>4</sub> ]                              |                                                                                                            |
| [OMIM][Tf <sub>2</sub> N]                             |                                                                                                            |
| [OMIM][PF <sub>6</sub> ]                              |                                                                                                            |
| [OMIM][FeCl <sub>4</sub> ]                            | 1-octyl-3-methylimidazolium bis(trifluoromethylsulfonyl)imide                                              |
| [P <sub>6,6,6,14</sub> ][Tf <sub>2</sub> N]           | 1-Octyl-3-methylimidazolium hexafluorophosphate                                                            |
| [P <sub>14,6,6,6</sub> ][Tf <sub>2</sub> N]           | 1-Octyl-3-methylimidazolium tetrachloroferrate                                                             |
| [P(C <sub>4</sub> ) <sub>4</sub> ][Ala]               | Trihexyltetradecylphosphonium bis(trifluoromethylsulfonyl)sulfonamide                                      |
| [P(C <sub>4</sub> ) <sub>4</sub> ][Gly]               | Trihexyltetradecylphosphonium bis(trifluoromethylsulfonyl)imide                                            |
| [P <sub>66614</sub> ][Met]                            | Tetrabutylphosphonium l- $\alpha$ -aminopropionic acid salt                                                |
| [P <sub>66614</sub> ][Pro]                            | Tetrabutylphosphonium aminoethanoic acid salt                                                              |
| [(P <sub>2</sub> -Et)H][TFE]                          | Trihexyl(tetradecyl)phosphonium methioninate                                                               |
|                                                       | Trihexyl(tetradecyl)phosphonium proline                                                                    |
| [(P <sub>2</sub> -Et) H][Im]                          | Tetramethyl(tris(dimethylamino)phosphoranylidene)phosphorictriamid-Et-imin trifluoroethanol                |
|                                                       | Tetramethyl(tris(dimethylamino)phosphoranylidene)phosphorictriamid-Et-imin imidazole                       |
| [(P <sub>2</sub> -Et) H][Pyr]                         | Tetramethyl(tris(dimethylamino)phosphoranylidene)phosphorictriamid-Et-imin pyrrolidone                     |
|                                                       | Tetramethyl(tris(dimethylamino)phosphoranylidene)phosphorictriamid-Et-imin phenol                          |
| [(P <sub>2</sub> -Et) H][PhO]                         | Trihexyl(tetradecyl)phosphonium pyrazole                                                                   |
|                                                       | Trihexyl(tetradecyl)phosphonium imidazole                                                                  |
| [P <sub>66614</sub> ][Pyr]                            | Trihexyl(tetradecyl)phosphonium indole                                                                     |
| [P <sub>66614</sub> ][Im]                             | Trihexyl(tetradecyl)phosphonium Trizole                                                                    |
| [P <sub>66614</sub> ][Ind]                            | Trihexyl(tetradecyl)phosphonium bentrizole                                                                 |
| [P <sub>66614</sub> ][Triz]                           | Trihexyl(tetradecyl)phosphonium tetrazole                                                                  |
| [P <sub>66614</sub> ][Bentriz]                        | Trihexyl(tetradecyl)phosphonium oxazolidinone                                                              |
| [P <sub>66614</sub> ][Tetz]                           | Trihexyl(tetradecyl)phosphonium phenol                                                                     |
| [P <sub>66614</sub> ][Oxa]                            | Trihexyl(tetradecyl)phosphonium hexachlorogadolinium                                                       |
| [P <sub>66614</sub> ][PhO]                            | Trihexyl(tetradecyl)phosphonium tetrachlorocobalt                                                          |
| [P <sub>6,6,6,14</sub> ][GdCl <sub>6</sub> ]          | Trihexyl(tetradecyl)phosphonium tetrachloroferrate                                                         |
| [P <sub>6,6,6,14</sub> ][CoCl <sub>4</sub> ]          | Trihexyl(tetradecyl)phosphonium tetrachloromanganese                                                       |
| [P <sub>6,6,6,14</sub> ][FeCl <sub>4</sub> ]          | Poly([2-(methylacryloyloxy)ethyl]trimethylammonium) chloride                                               |
| [P <sub>6,6,6,14</sub> ][MnCl <sub>4</sub> ]          | Poly(1-styrenemethyl-3-methylimidazolium bis(trifluoromethylsulfonyl)imide)                                |
| poly[META][Cl]                                        | Poly(1-vinyl-3-ethyl-imidazolium) bis(trifluoromethane sulfonyl)amide                                      |
| poly[SMIM][Tf <sub>2</sub> N]                         | Poly(1-vinyl-3-ethyl-imidazolium) bromide                                                                  |
| poly[ViEtIm][Tf <sub>2</sub> N]                       | Poly(1-vinyl-3-ethyl-imidazolium) tetrafluoroborate                                                        |
| poly[ViEtIm][Br]                                      | 1,3-Di(3-methylimidazolium)propane bis(trifluoromethylsulfonyl)imide                                       |
| poly[ViEtIm][BF <sub>4</sub> ]                        | Trihexyl(tetradecyl)phosphonium chloride                                                                   |
| pr[MIM] <sub>2</sub> [Tf <sub>2</sub> N] <sub>2</sub> | Trihexyl(tetradecyl)phosphonium bromide                                                                    |
| [QP][Cl]; Cyphos IL 101                               | 1-(Silylpropyl)-3-methyl-imidazolium hexafluorophosphate                                                   |
| [QP][Br]; Cyphos IL 102                               | Tri-(2-hydroxy ethyl)-ammonium acetate                                                                     |
| [SPMIM][PF <sub>6</sub> ]                             | Quaternary ammonium compounds, coco alkylbis (hydroxyethyl)methyl, ethoxylated, chlorides, methyl chloride |
| THEAA                                                 |                                                                                                            |
| TEGO IL K <sub>5</sub>                                |                                                                                                            |
